# Supplementary material for: Tris base assisted synthesis of monodispersed citrate-capped gold nanospheres with tunable size
Source: Royal Society of Chemistry journal article supplement (doi:10.1039/c6ra11189k), 2016-01-01
Supplement: c6ra11189k1.pdf [file c6ra11189k1.pdf]

## Supporting Information

### Tris Base Assisted Synthesis of Monodispersed Citrate-capped Gold Nanospheres with Tunable Size

*Xuefei Lu,<sup>a,b,‡</sup> Anirban Dandapat,<sup>c,‡</sup> Youju Huang,<sup>\*a</sup> Lei Zhang,<sup>a</sup> Yun Rong,<sup>a</sup> Liwei Dai,<sup>a</sup> Yoel Sasson,<sup>c</sup> Jiawei Zhang,<sup>a</sup> and Tao Chen<sup>\*a</sup>*

<sup>a</sup> Division of Polymer and Composite Materials, Ningbo Institute of Material Technology and Engineering Chinese Academy of Sciences, No. 1219 Zhongguan West Road, Zhenhai District, Ningbo 315201, China

<sup>b</sup> Department of Polymer Materials, College of Materials Science and Engineering, Shanghai University, Nanchen Road 333, Shanghai 200444, China

<sup>c</sup> Casali Center of Applied Chemistry, Institute of Chemistry, the Hebrew University of Jerusalem, Jerusalem 91904, Israel

<sup>‡</sup> These authors contribute equally to this work.

---

\*Corresponding Authors: E-mail: [yjhuang@nimte.ac.cn](mailto:yjhuang@nimte.ac.cn) and [tao.chen@nimte.ac.cn](mailto:tao.chen@nimte.ac.cn).

**Table S1.** The synthesis of AuNPs in Fig.3 using both SC and TB under different heating time.

| Sample | Reductant  |            | pH<br>Value | Heating SC    |              | SPR Peak<br>(dipolar)<br>(nm) | Size of<br>Particles<br>(nm) |
|--------|------------|------------|-------------|---------------|--------------|-------------------------------|------------------------------|
|        | SC<br>(mL) | TB<br>(mL) |             | Time<br>(min) | Temp<br>(°C) |                               |                              |
| A      | 10         | 5          | 7.76        | 50            | 137          | 517                           | 18.8                         |
| B      | 10         | 5          | 7.76        | 40            |              | 521                           | 39.2                         |
| C      | 10         | 5          | 8.04        | 20            |              | 524                           | 48.8                         |
| D      | 10         | 5          | 8.10        | 10            |              | 530                           | 63.7                         |

**Table S2.** The synthesis of AuNPs in Fig.4 using both SC and TB under different temperatures.

| Sample | Reductant  |            | pH<br>Value | Heating SC    |              | SPR Peak<br>(dipolar)<br>(nm) | Size of<br>Particles<br>(nm) |
|--------|------------|------------|-------------|---------------|--------------|-------------------------------|------------------------------|
|        | SC<br>(mL) | TB<br>(mL) |             | Time<br>(min) | Temp<br>(°C) |                               |                              |
| E      | 10         | 5          | 8.18        | 5             | 140          | 534                           | 70.4                         |
| F      | 10         | 5          | 8.29        |               | 130          | 542                           | 81.8                         |
| G      | 10         | 5          | 8.30        |               | 120          | 561                           | 104.8                        |
| H      | 10         | 5          | 8.32        |               | 110          | 571                           | 114.7                        |

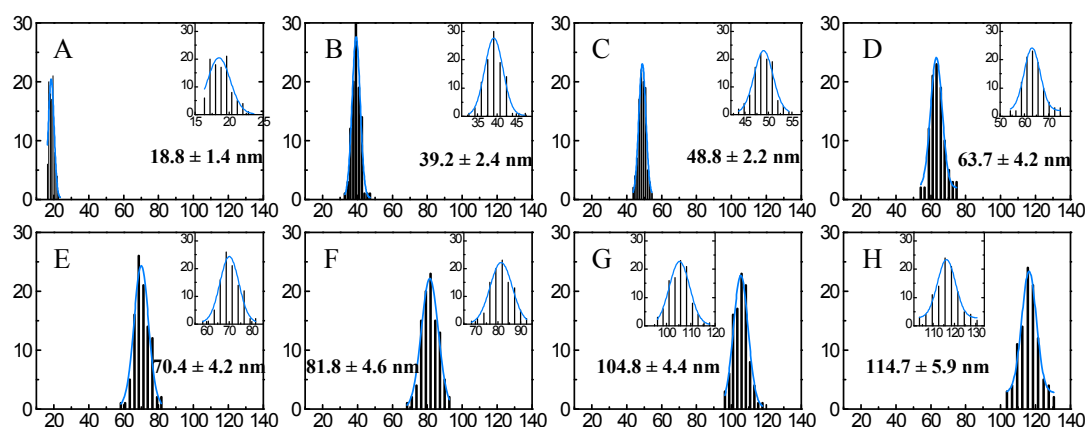

**Fig. S1.** The statistic diameters of AuNPs based on TEM images. Histograms A-H correspond to the sample A-H in Fig. 3 and Fig. 4, respectively. The horizontal axis represents the diameter and the vertical axis represents the amount of AuNPs. More than 100 NPs were counted in each case.

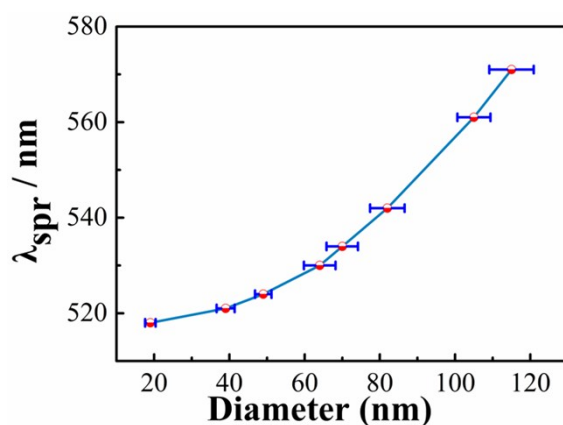

**Fig. S2.** The relationship between the average diameter of AuNPs and their corresponding plasmonic peaks of UV-vis spectra.

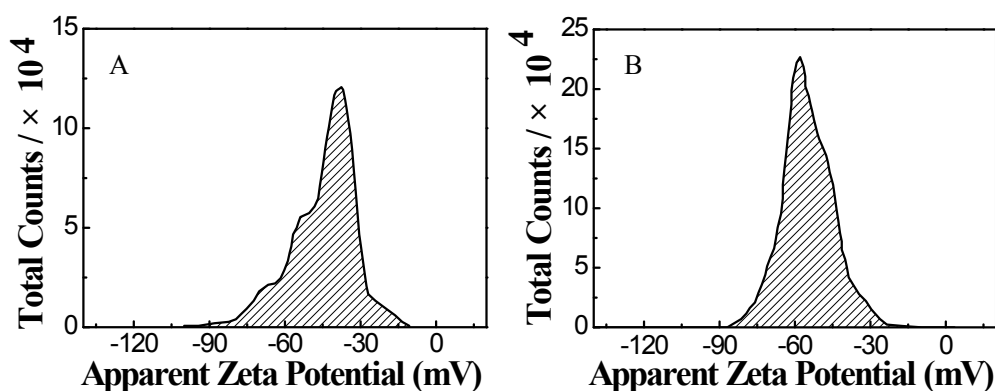

**Fig. S3.** Zeta potential of AuNPs: (A) -45.3 mV (Table S1C) and (B) -55.2 mV (Table S2H).

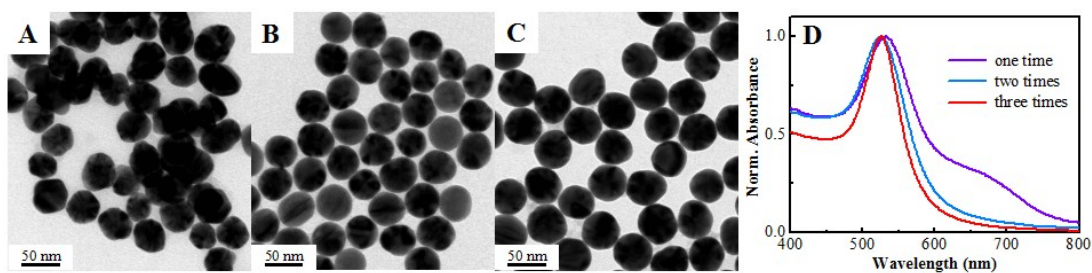

**Fig. S4.** The SEM images and UV/vis absorption spectra (D) of AuNPs synthesized by adding one time (A), two times (B) and three times (C)  $\text{HAuCl}_4$  solution.

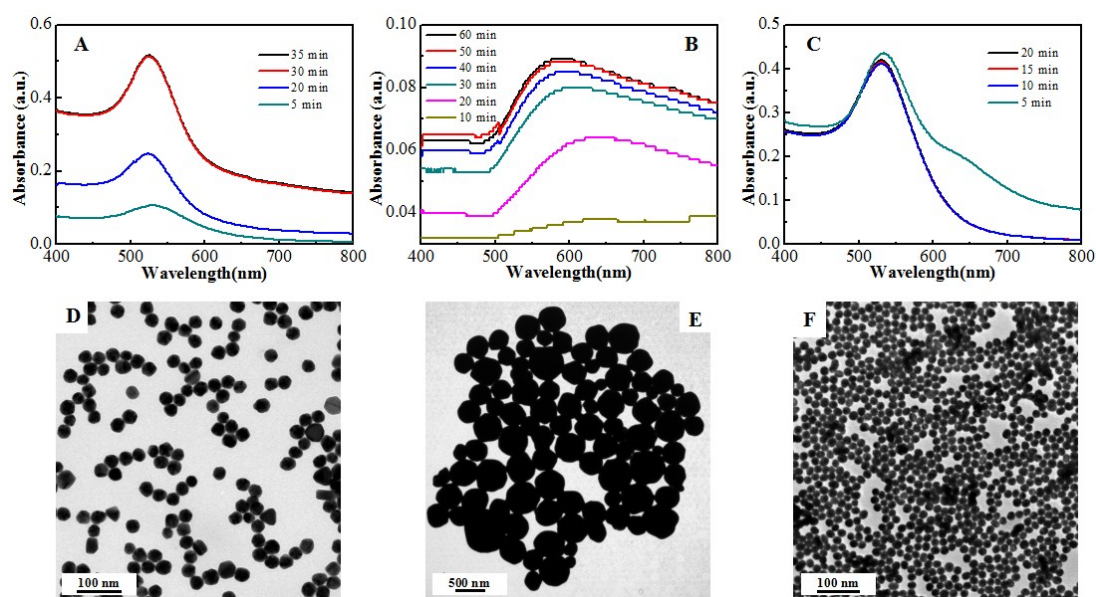

**Fig. S5.** The UV/vis absorption spectra and corresponding TEM images of AuNPs reduced by SC (A, D), TB (B, E) and SC/TB (C, F).

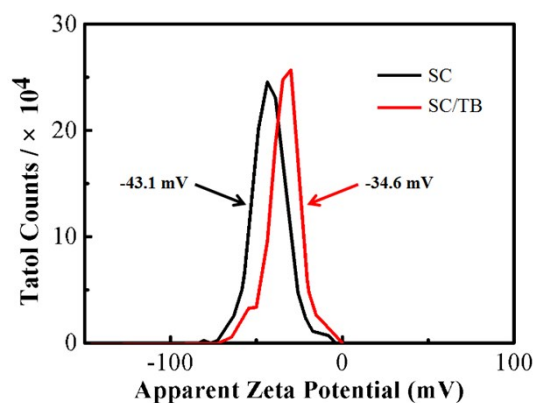

**Fig. S6.** Zeta potential of AuNPs synthesized by SC (black line) and SC/TB (red line).

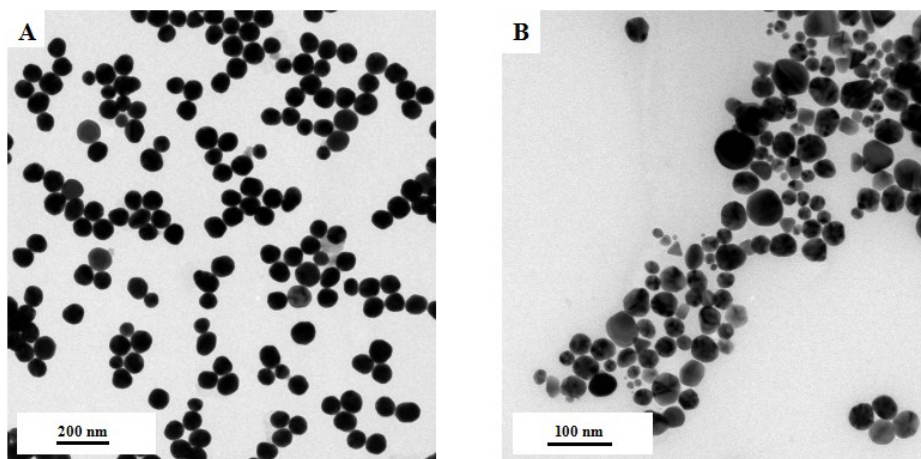

**Fig. S7.** TEM images of polydispersed AuNPs synthesized by heating 1 minute at 137 °C (A) and heating 30 min at 100 °C (B).
